CORRECTION

# Correction: Durations and Delays in Care Seeking, Diagnosis and Treatment Initiation in Uncomplicated Pulmonary Tuberculosis Patients in Mumbai, India

Nerges Mistry, Sheela Rangan, Yatin Dholakia, Eunice Lobo, Shimoni Shah, Akshaya Patil

In Fig 5, Fig 5B is missing. Please see the corrected [Fig 5](#) here.

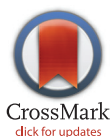

## OPEN ACCESS

**Citation:** Mistry N, Rangan S, Dholakia Y, Lobo E, Shah S, Patil A (2016) Correction: Durations and Delays in Care Seeking, Diagnosis and Treatment Initiation in Uncomplicated Pulmonary Tuberculosis Patients in Mumbai, India. PLoS ONE 11(8): e0160796. doi:10.1371/journal.pone.0160796

**Published:** August 3, 2016

**Copyright:** © 2016 Mistry et al. This is an open access article distributed under the terms of the [Creative Commons Attribution License](#), which permits unrestricted use, distribution, and reproduction in any medium, provided the original author and source are credited.

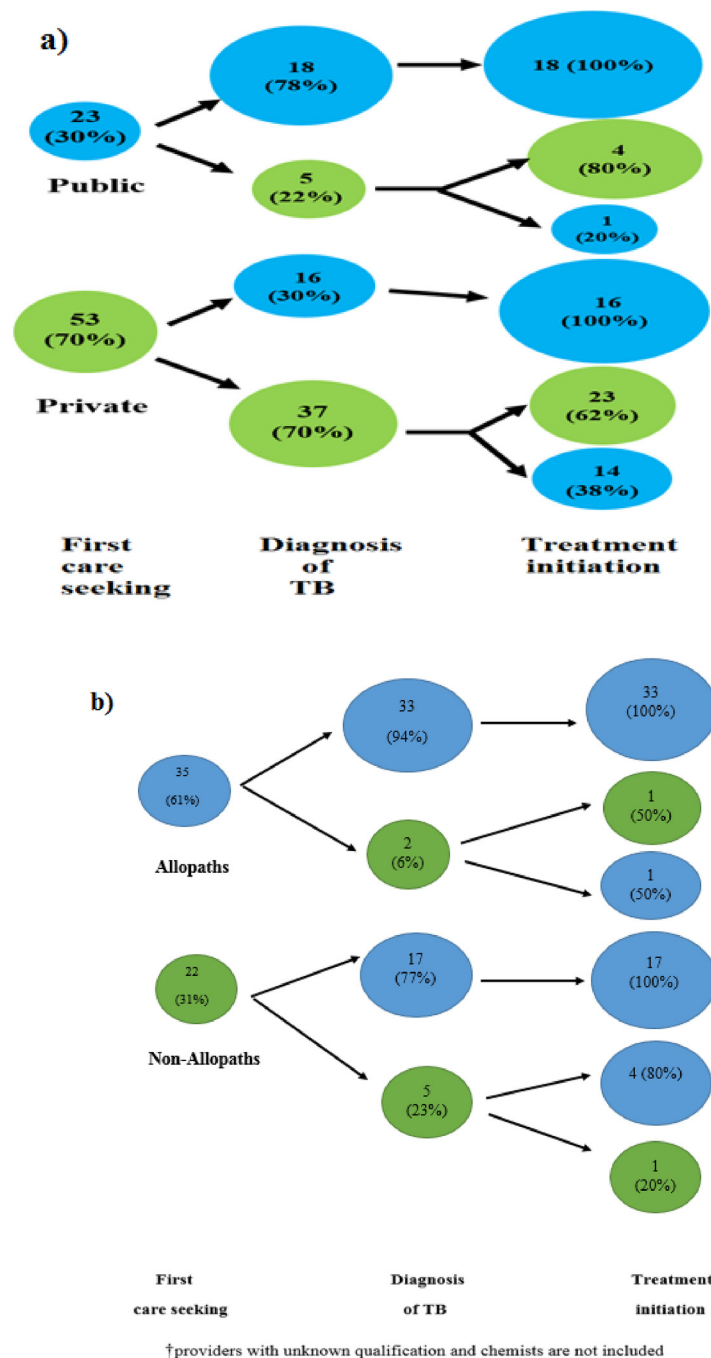

**Fig 5.** Provider switching at different stages of the TB patient care pathway: a) between public and private sector; b) between allopaths and non-allopaths†. The figures depict the patient behaviour in seeking TB care at different stages of the pathway and preference for accessing the public or the private sector, and allopaths or non-allopaths.

doi:10.1371/journal.pone.0160796.g001

## Reference

1. Mistry N, Rangan S, Dholakia Y, Lobo E, Shah S, Patil A (2016) Durations and Delays in Care Seeking, Diagnosis and Treatment Initiation in Uncomplicated Pulmonary Tuberculosis Patients in Mumbai, India. PLoS ONE 11(3): e0152287. doi:10.1371/journal.pone.0152287 PMID: 27018589
